# Supplementary material for: Nup358 interacts with Dishevelled and aPKC to regulate neuronal polarity
Source: PubMed Central journal article supplement (PMC3828775; doi:10.1242/bio.20135363), 2013-10-16
Supplement: supp_bio.20135363_bio.20135363-s1.pdf [file supp_bio.20135363_bio.20135363-s1.pdf]

## Supplementary Material

Pankhuri Vyas et al. doi: 10.1242/bio.20135363

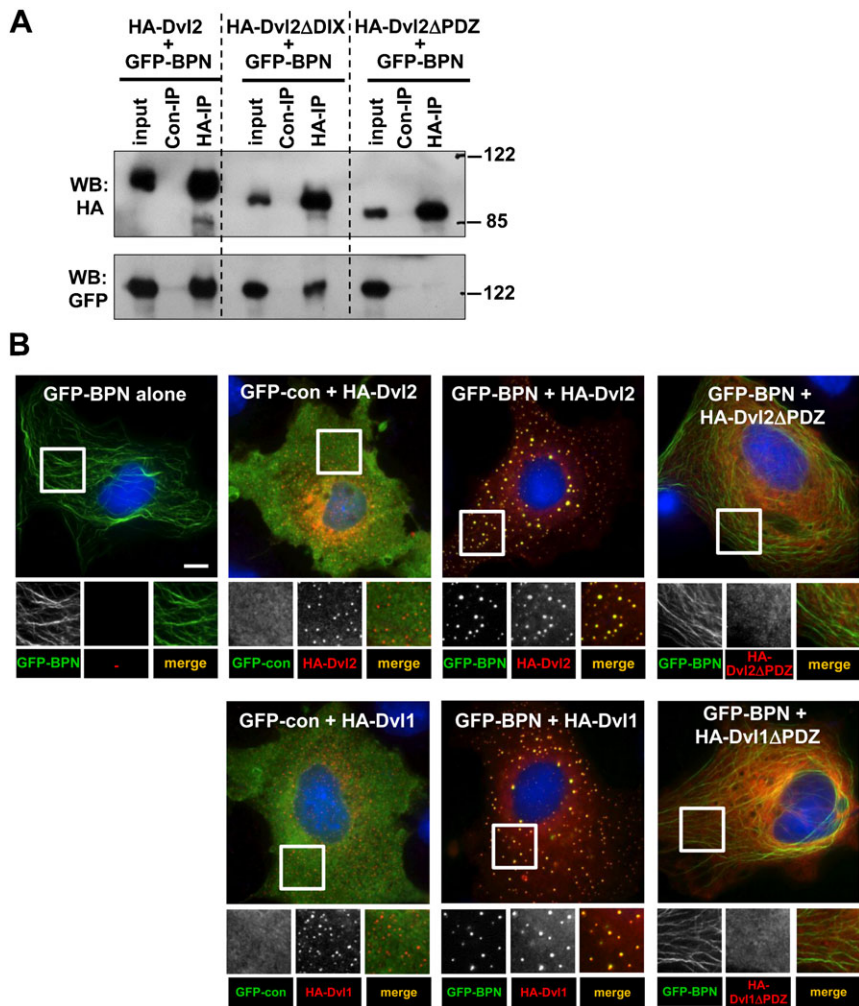

**Fig. S1. The N-terminal region of Nup358 (BPN) interacts with Dvl in a PDZ dependent manner.** (A) HEK293T cells were co-transfected HA-Dvl2, HA-Dvl2 $\Delta$ DIX or HA-Dvl2 $\Delta$ PDZ with GFP-BPN and were subjected to immunoprecipitation with control protein A beads (Con-IP) or HA-antibody bound protein A beads (HA-IP). The immunoprecipitates were probed with indicated antibodies by western blotting (WB). (B) COS-7 cells were transfected with GFP (GFP-con) or GFP-BPN and HA-Dvl2, HA-Dvl2 $\Delta$ PDZ, HA-Dvl1 or HA-Dvl1 $\Delta$ PDZ as indicated. GFP is visualized by epifluorescence (green) and HA tagged proteins were detected using HA-specific antibodies (red). DNA is stained with Hoechst 33342 dye (blue).

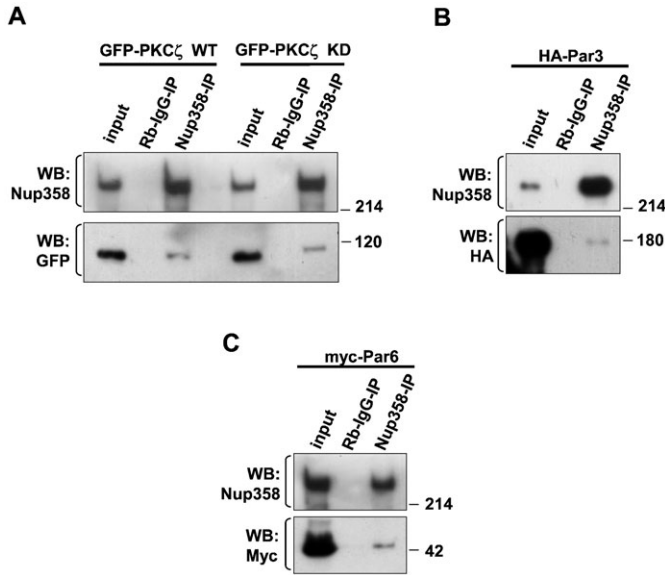

**Fig. S2. Interaction of Nup358 with components of Par polarity complex.** (A) Nup358 interacts with PKC $\zeta$  independent of its kinase activity. GFP-tagged PKC $\zeta$  wild type (WT) and Kinase dead mutant (KD) were overexpressed in HEK293T cells, and immunoprecipitation of endogenous Nup358 was performed using anti-Nup358 antibodies (Nup358-IP), while rabbit-IgG (Rb-IgG-IP) was used as control. Western blotting (WB) was done using anti-GFP and mAb414 (for Nup358) antibodies. Nup358 interacts with PAR3 (B) and Par6 (C). HA-PAR3 or myc-PAR6 was overexpressed in HEK293T cells and immunoprecipitation was performed using anti-Nup358 antibodies (Nup358-IP). Rabbit IgG was used as control (Rb-IgG-IP). The immunoprecipitates were probed with indicated antibodies.

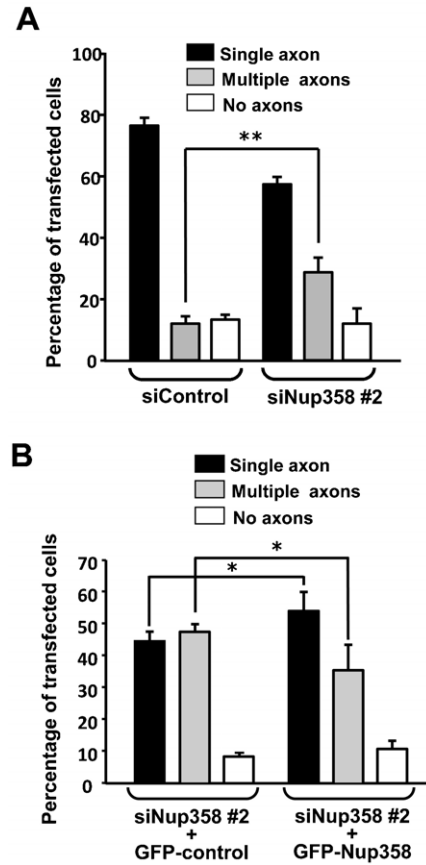

**Fig. S3. Overexpression of Nup358 significantly rescues phenotypes caused due to Nup358 depletion in rat hippocampal neurons.** (A) Quantitative data representing polarization of rat hippocampal neurons transfected with control siRNA (siControl) or specific siRNA against rat Nup358 (siNup358 no. 2). Error bars indicate standard deviations,  $n=3$ ,  $**P<0.001$ , Student's  $t$  test. (B) Rat hippocampal neurons were transfected with siNup358 no. 2 and GFP control or GFP-Nup358 constructs as indicated. Neuronal polarization of transfected cells was assessed by Tau-1 staining. Error bars indicate standard deviations,  $n=4$ ,  $*P<0.05$ , Student's  $t$  test.

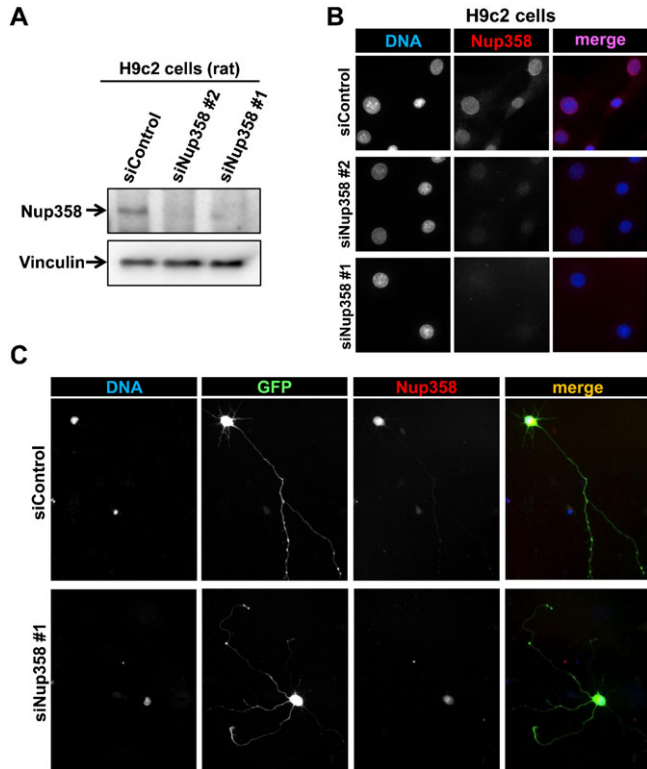

**Fig. S4. Nup358 depletion leads to multiple axon formation.** (A) Rat cardiomyocyte cells (H9c2) were transfected with control siRNA (siControl) or individual Nup358 specific siRNA (siNup358 no. 1 or no. 2). siNup358 no. 1; the siRNA used throughout the paper, and named siNup358 elsewhere. siNup358 no. 2; rat specific siRNA against Nup358 (target sequence: 5'-GGAAGGCGAGTGGGAGTGT-3') and were subjected to western blotting using Nup358 antibody. Vinculin was used as loading control. (B) H9c2 cells from the above-mentioned experiments were fixed and stained for Nup358 with specific antibodies (red). (C) Rat hippocampal neurons transfected with control (siControl) or Nup358 specific siRNA (siNup358 no. 1) and pBetaActin-eGFP (as transfection marker, GFP, green) were stained for Nup358 (red). DNA was stained with Hoechst 33342 dye (blue).

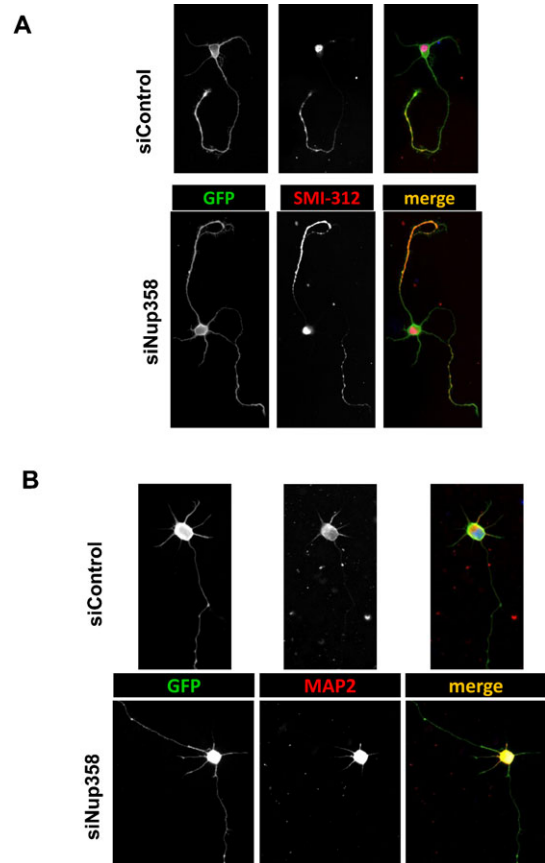

**Fig. S5. Nup358 depletion leads to multiple axon formation.** Rat hippocampal neurons transfected with control siRNA (siControl) or Nup358 siRNA (siNup358) and pBetaActin-eGFP (as transfection marker, GFP, green) were stained with axonal marker SMI-312 (A, red) or dendrite marker MAP2 (B, red). DNA is visualized by Hoechst 33342 staining (blue).
